# Supplementary material for: BI-D1870 Induces Mitotic Dysfunction and Apoptosis in Neuroblastoma by Regulating the PI3K-Akt-mTORC1 Signal Axis
Source: MDPI journal article supplement (doi:10.3390/cancers15072023), 2023-03-28
Supplement: s1 [file s1]

# Supplementary Materials: BI-D1870 Induces Mitotic Catastrophe And Apoptosis In Neuroblastoma By Regulating PI3K-Akt-mTORC1

Liming Jin, Tao Mi, Xin Wu, Zhang Wang, Zhaoxia Zhang, Jiayan Liu, Zhaoying Wang, Jinkui Wang, Mujie Li, Chunnian Ren, Peng Guo and Dawei He

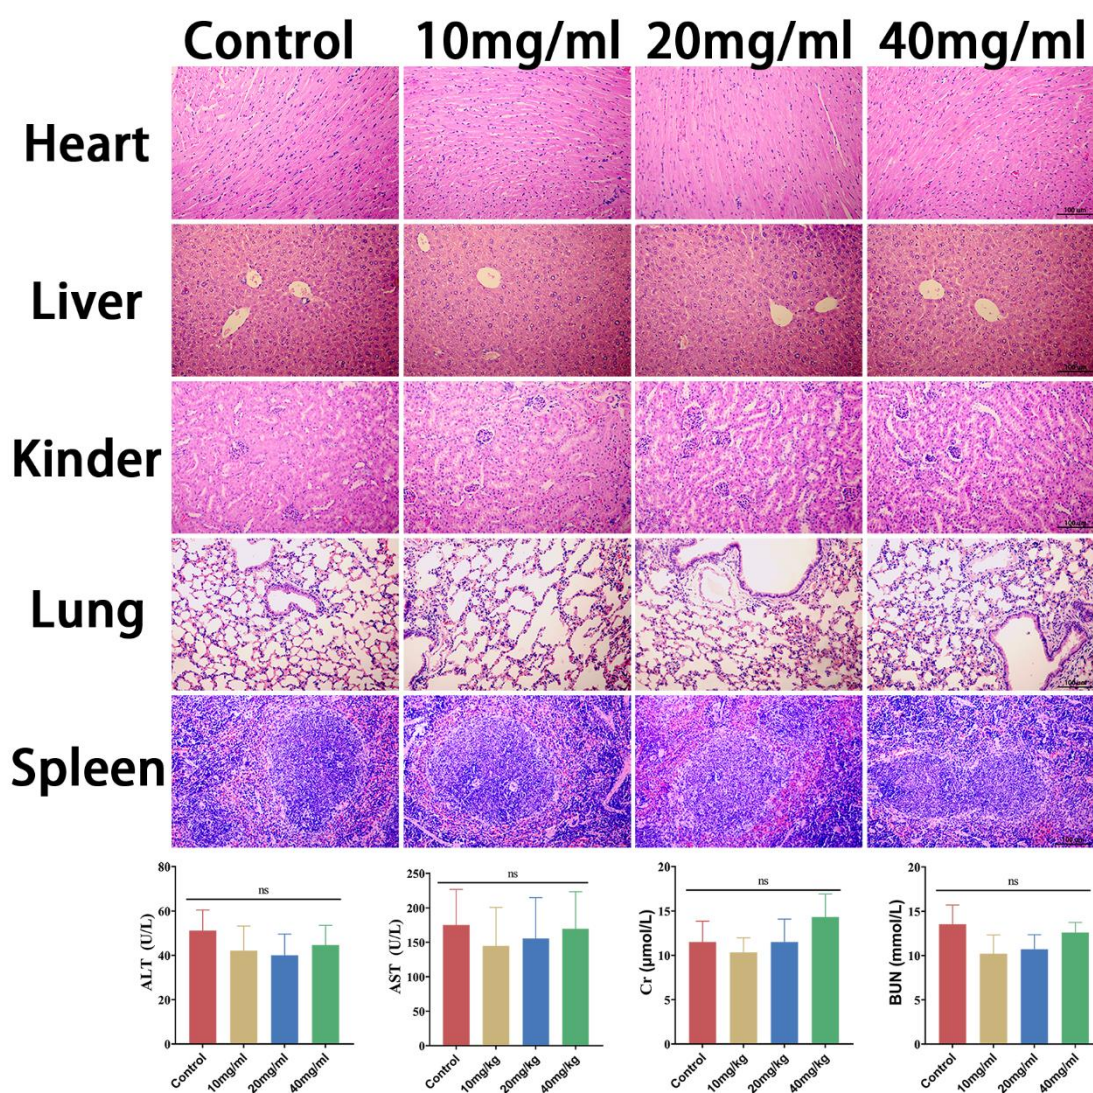

**Figure S1.** HE staining, liver function, and renal function. (A) HE Staining of heart, liver, kidney, lung and spleen, Scale bar: 100 $\mu$ m; (B) ALT, AST, Cr and BUN, ns p > 0.05.
