# Supplementary material for: BI-D1870 Induces Mitotic Dysfunction and Apoptosis in Neuroblastoma by Regulating the PI3K-Akt-mTORC1 Signal Axis
Source: MDPI journal article supplement (doi:10.3390/cancers15072023), 2023-03-28
Supplement: s1 [file s1]

# GADPH

## SH-SY5Y Cell

Control | 0.64μM BI-D1870 | 1.28μM BI-D1870 | 2.56μM BI-D1870 ; Control | 0.64μM BI-D1870 | 1.28μM BI-D1870 | 2.56μM BI-D1870

KDa

40 KDa →

36

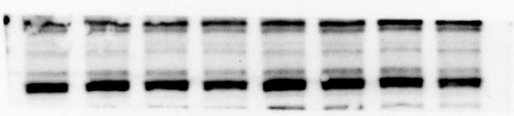

100 : 100 : 100 : 100 ; 100 : 100 : 100 : 100

Figure 5-G

**Bax**  
**SH-SY5Y Cell**

Control | 0.64μM BI-D1870 | 1.28μM BI-D1870 | 2.56μM BI-D1870 ; Control | 0.64μM BI-D1870 | 1.28μM BI-D1870 | 2.56μM BI-D1870

KDa

21

20 KDa →

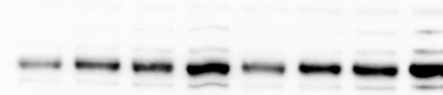

100 : 153 : 233 : 435 ; 100 : 178 : 217 : 491

Figure 5-G

## Bcl-2 SH-SY5Y Cell

Control | 0.64 $\mu$ M BI-D1870 | 1.28 $\mu$ M BI-D1870 | 2.56 $\mu$ M BI-D1870 ; Control | 0.64 $\mu$ M BI-D1870 | 1.28 $\mu$ M BI-D1870 | 2.56 $\mu$ M BI-D1870

KDa  
26

20 KDa →

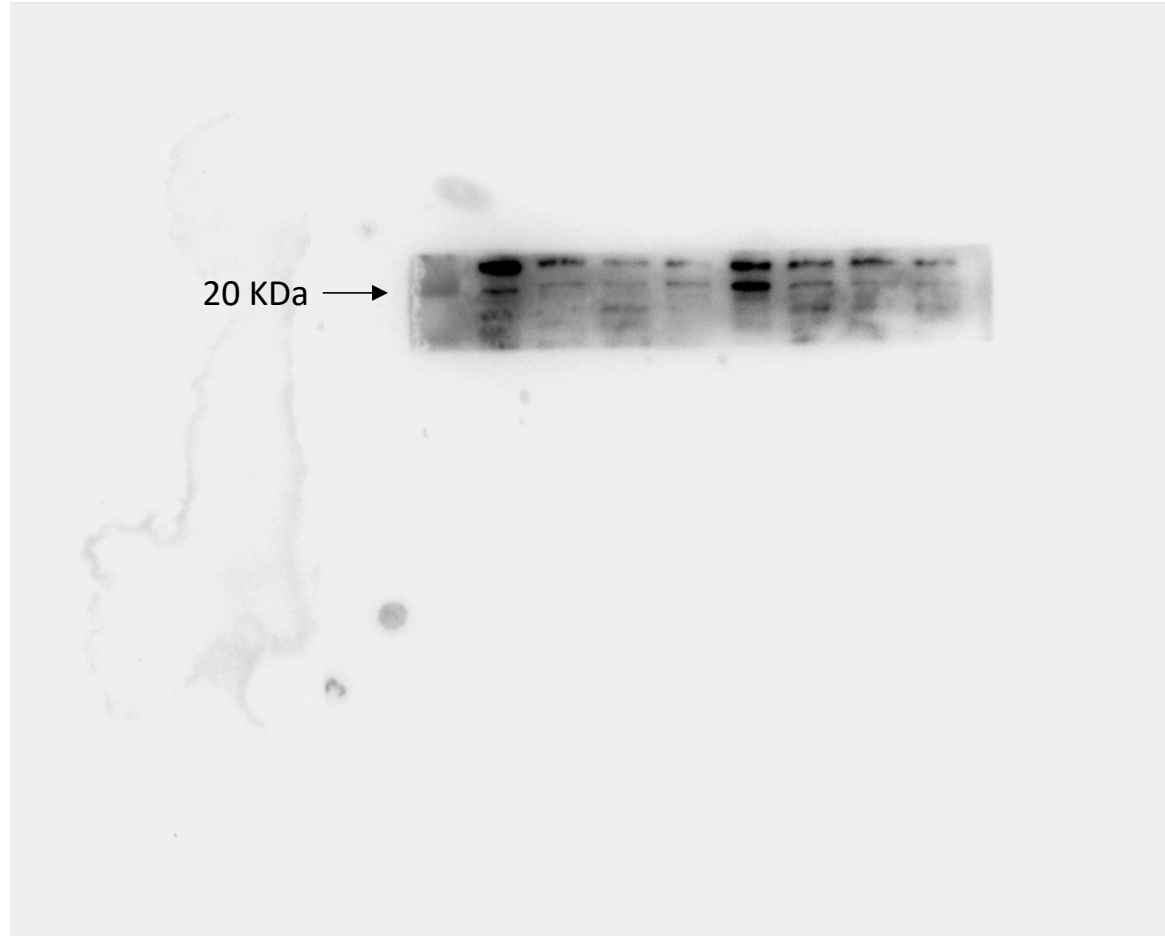

100 : 63.5 : 48.1 : 126.1 ; 100 : 51.1 : 44.2 : 19.4

Figure 5-G

**Caepase 3**  
**Cleaved-caspase 3**  
**SH-SY5Y Cell**

Control | 0.64μM BI-D1870 | 1.28μM BI-D1870 | 2.56μM BI-D1870 ; Control | 0.64μM BI-D1870 | 1.28μM BI-D1870 | 2.56μM BI-D1870

KDa

35 KDa →

32

17

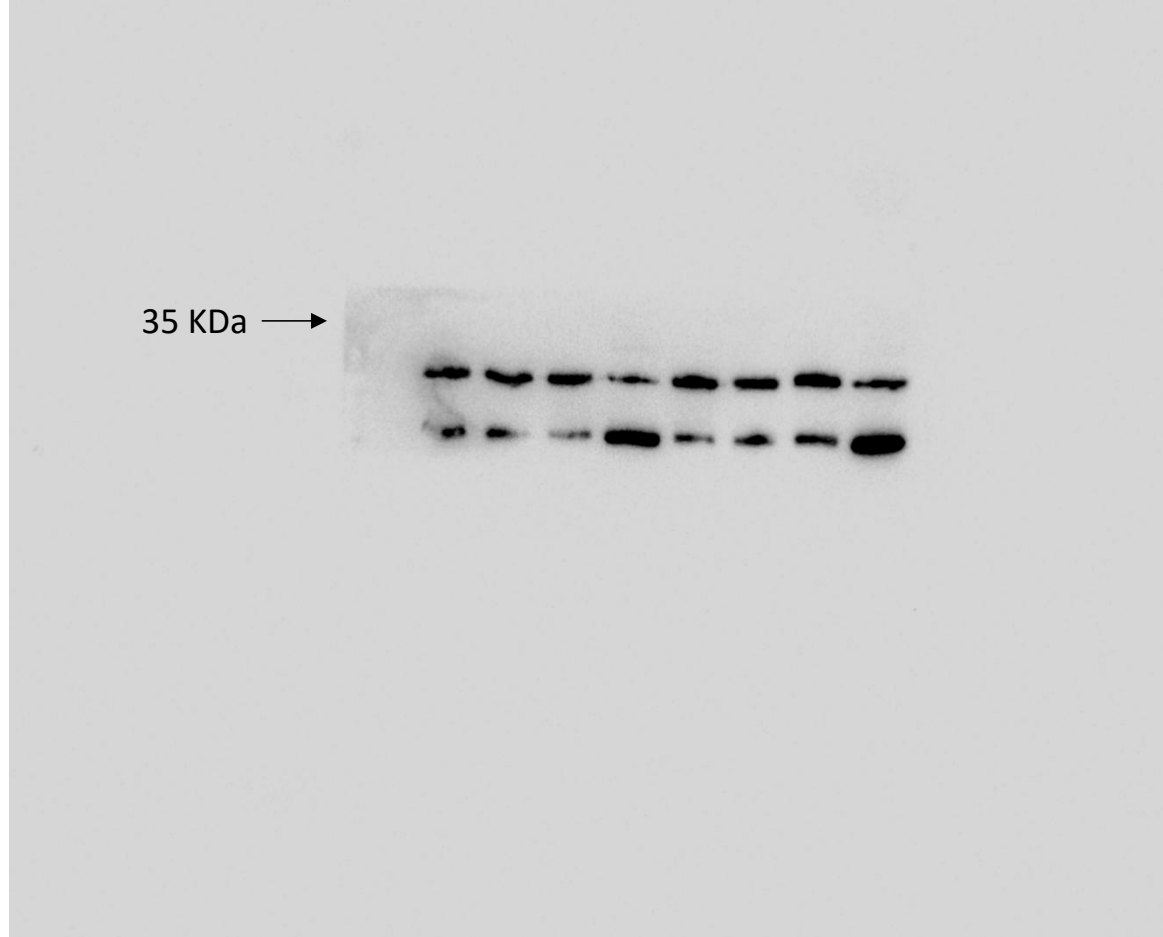

100 : 164 : 198 : 375 ; 100 : 169 : 201 : 388

Figure 5-G

# GADPH

## SK-N-DZ Cell

Control | 1.305μM BI-D1870 | 2.61μM BI-D1870 | 5.22μM BI-D1870 ; Control | 1.305μM BI-D1870 | 2.61μM BI-D1870 | 5.22μM BI-D1870

KDa

36

35 KDa →

100 : 100 : 100 : 100 ; 100 : 100 : 100 : 100

Figure 5-H

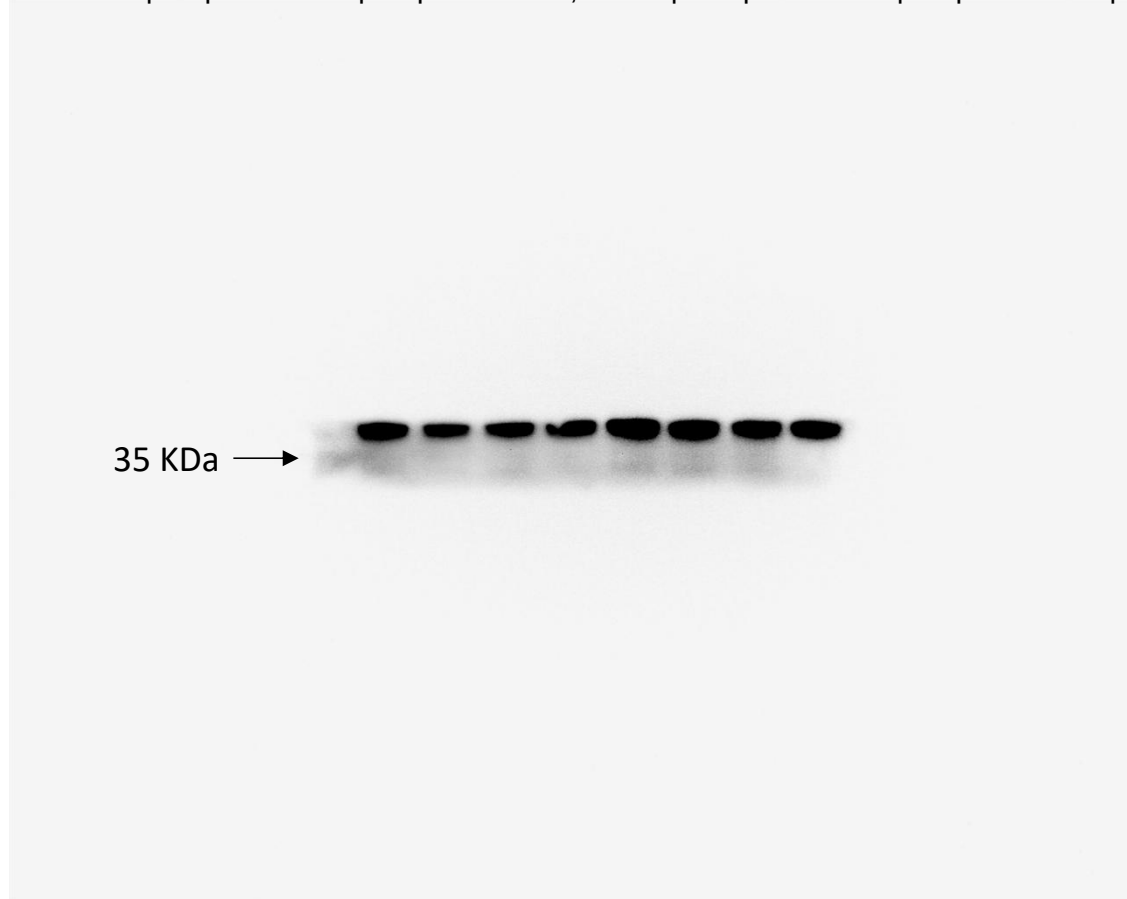

**Bax**  
**SK-N-DZ Cell**

Control | 1.305 $\mu$ M BI-D1870 | 2.61 $\mu$ M BI-D1870 | 5.22 $\mu$ M BI-D1870 ; Control | 1.305 $\mu$ M BI-D1870 | 2.61 $\mu$ M BI-D1870 | 5.22 $\mu$ M BI-D1870

KDa

21

20 KDa →

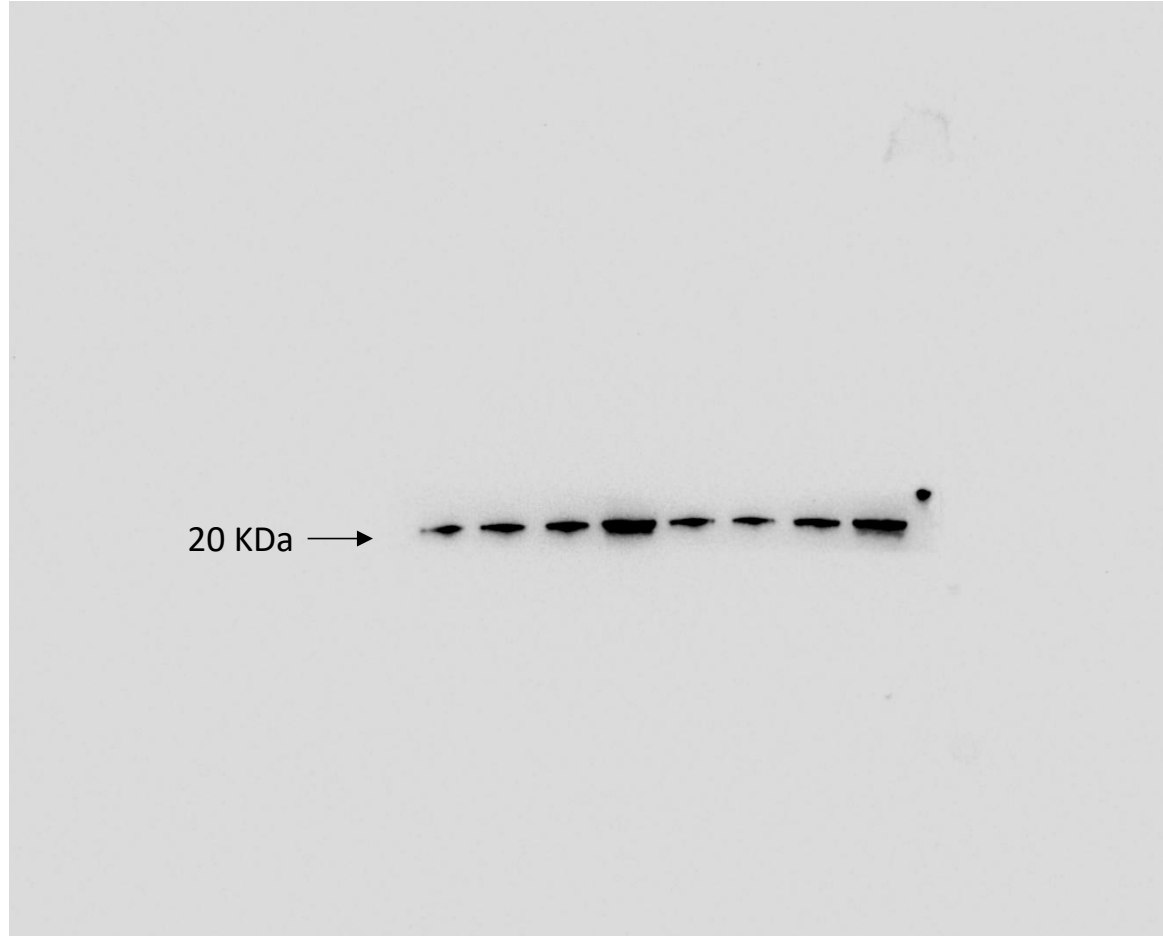

100 : 124 : 160 : 308 ; 100 : 122 : 172 : 311

Figure 5-H

# Bcl-2

## SK-N-DZ Cell

Control | 1.305μM BI-D1870 | 2.61μM BI-D1870 | 5.22μM BI-D1870 ; Control | 1.305μM BI-D1870 | 2.61μM BI-D1870 | 5.22μM BI-D1870

KDa

26

35 KDa →

20 KDa →

100 : 38.9 : 24.3 : 14.3 ; 100 : 33.1 : 20.1 : 12.6

Figure 5-H

**Caspase 3**  
**Cleaved-caspase 3**  
**SK-N-DZ Cell**

Control | 1.305 $\mu$ M BI-D1870 | 2.61 $\mu$ M BI-D1870 | 5.22 $\mu$ M BI-D1870 ; Control | 1.305 $\mu$ M BI-D1870 | 2.61 $\mu$ M BI-D1870 | 5.22 $\mu$ M BI-D1870

KDa

32

17

35 KDa →

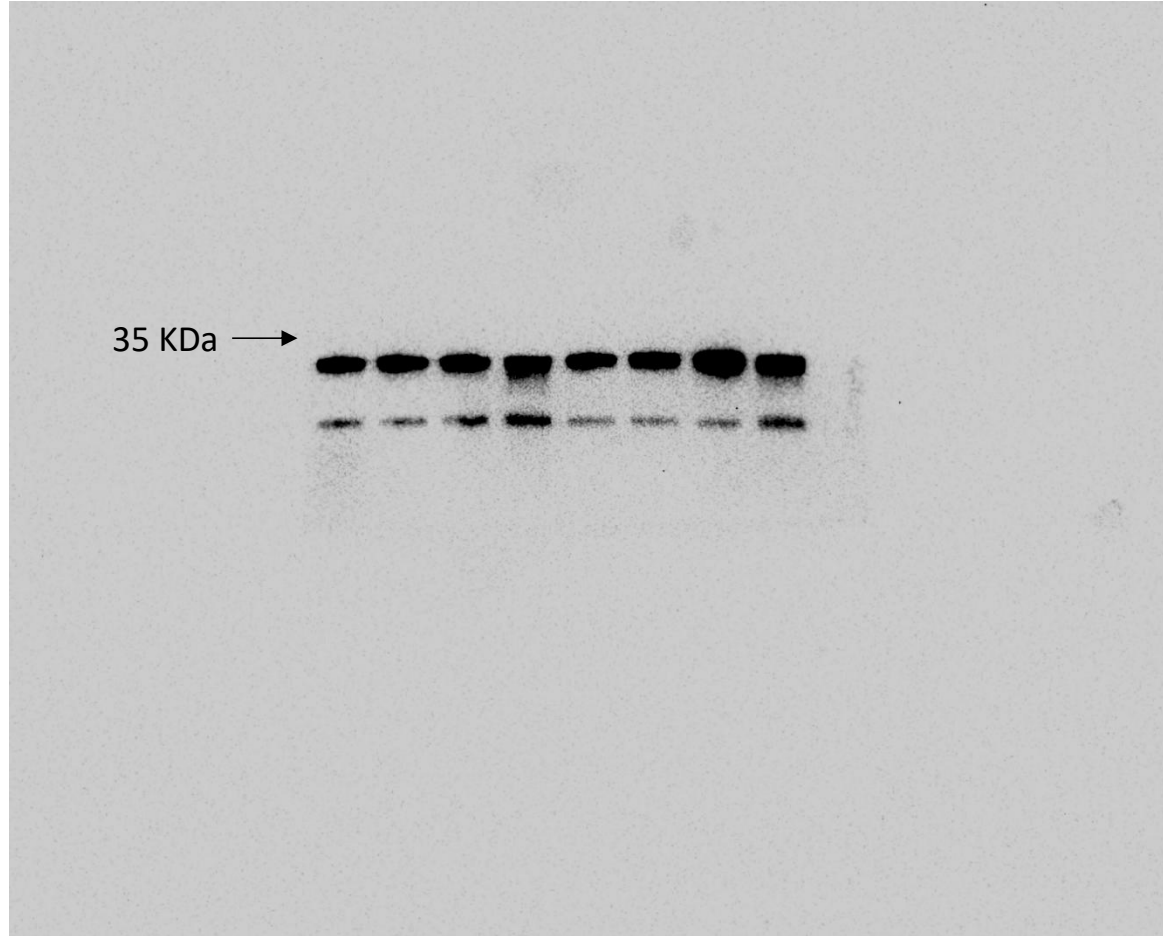

100 : 118 : 131 : 203 ; 100 : 120 : 144 : 211

Figure 5-H



# GADPH

## SH-SY5Y Cell

Control | 0.64 $\mu$ M BI-D1870 | 1.28 $\mu$ M BI-D1870 | 2.56 $\mu$ M BI-D1870

KDa

36

35 KDa →

100 : 100 : 100 : 100

Figure 7-G

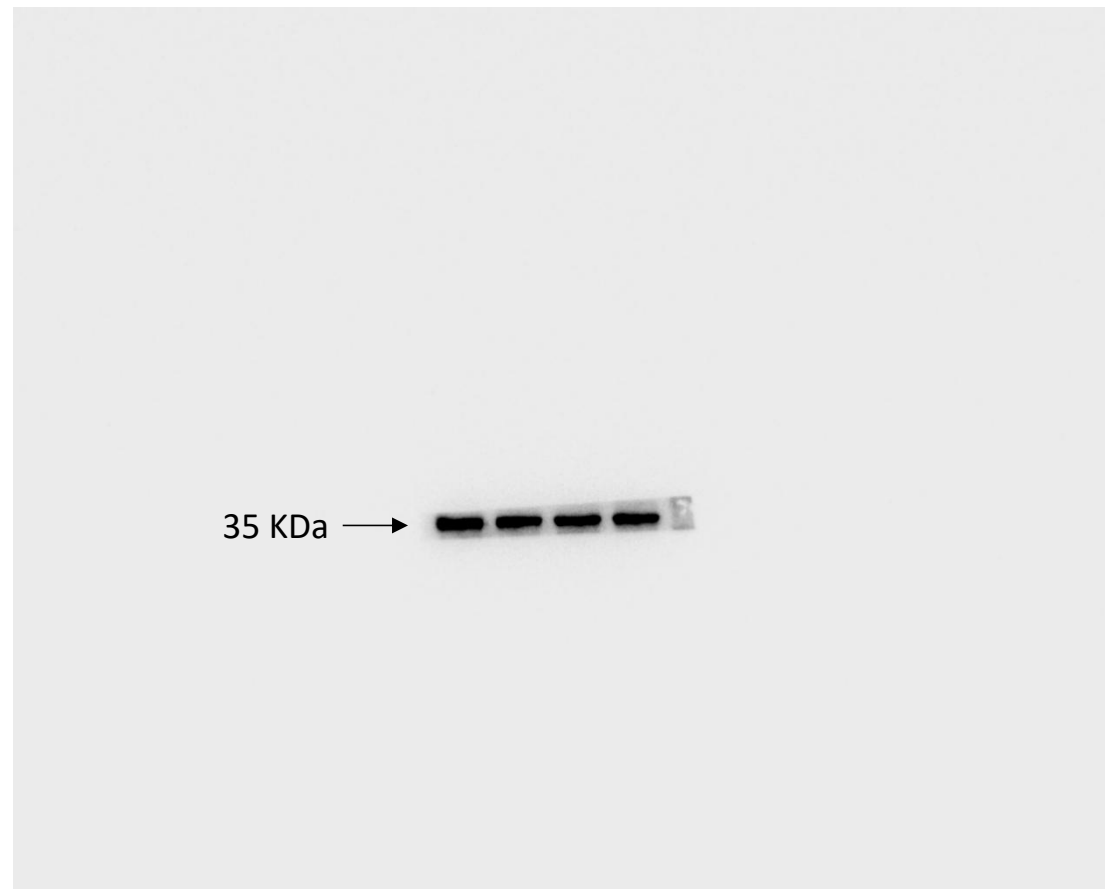

**PI3K**  
**SH-SY5Y Cell**

Control | 0.64 $\mu$ M BI-D1870 | 1.28 $\mu$ M BI-D1870 | 2.56 $\mu$ M BI-D1870

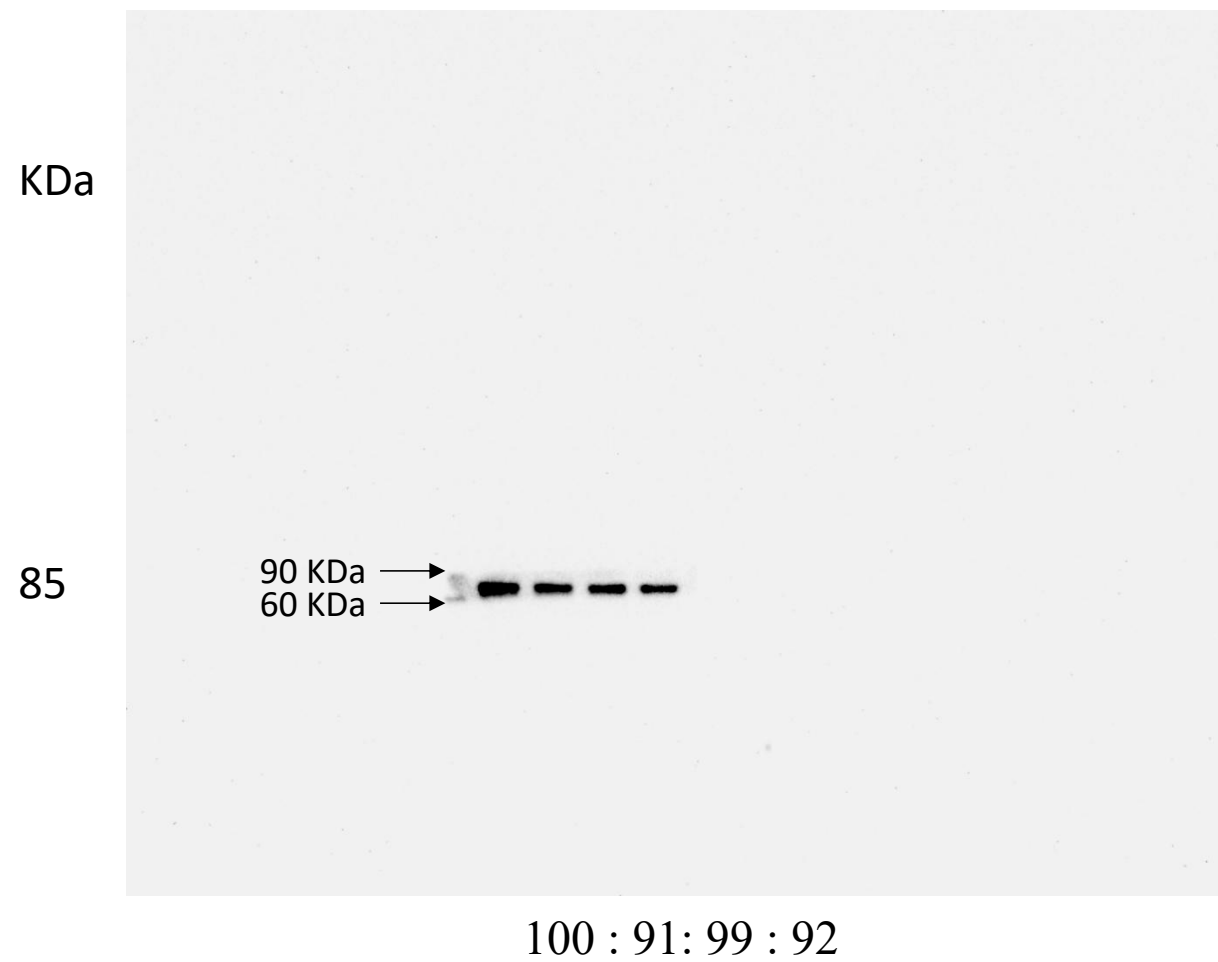

Figure 7-G

**p-PI3K**  
**SH-SY5Y Cell**

Control | 0.64 $\mu$ M BI-D1870 | 1.28 $\mu$ M BI-D1870 | 2.56 $\mu$ M BI-D1870

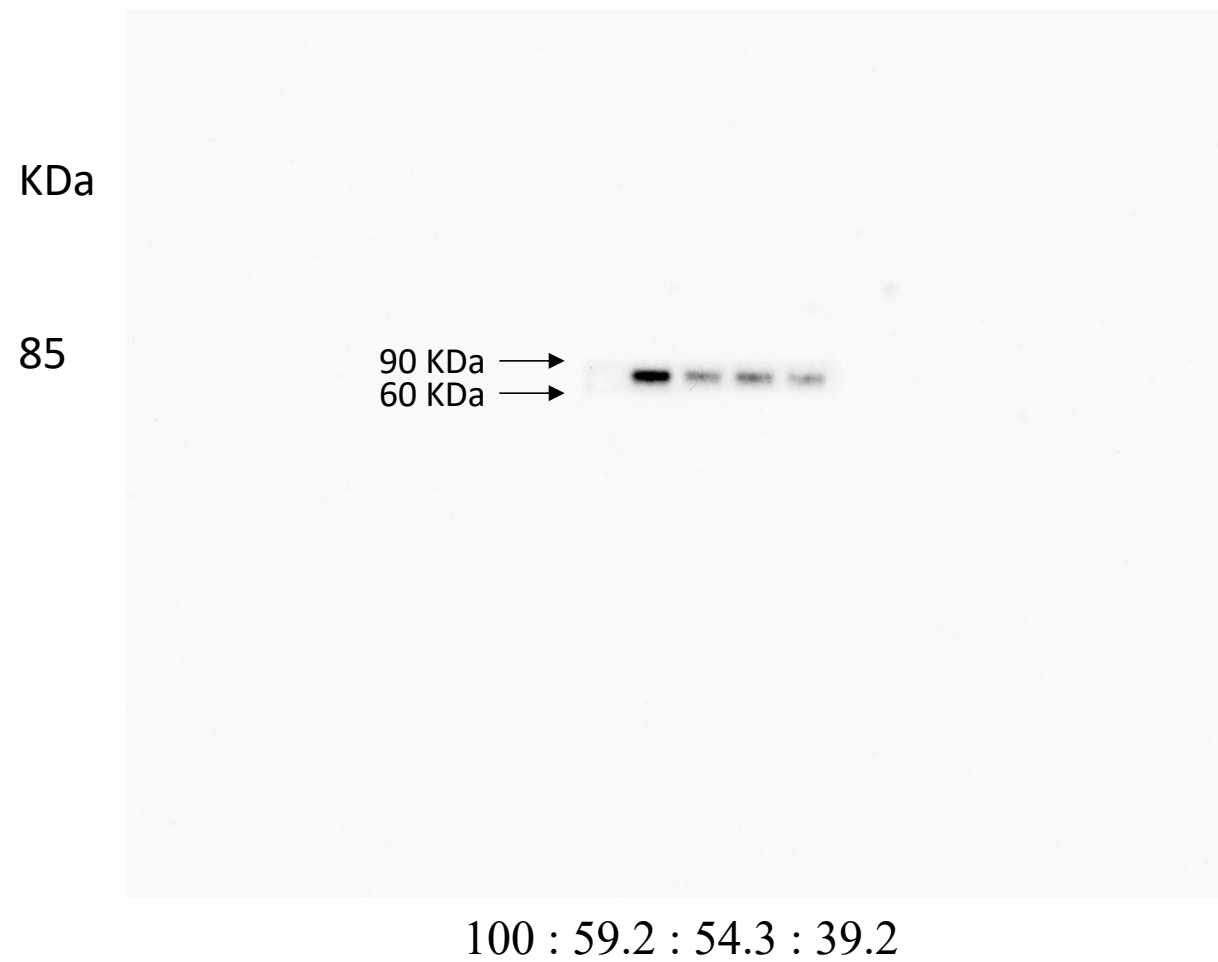

Figure 7-G

**Akt**  
**SH-SY5Y Cell**

Control | 0.64 $\mu$ M BI-D1870 | 1.28 $\mu$ M BI-D1870 | 2.56 $\mu$ M BI-D1870

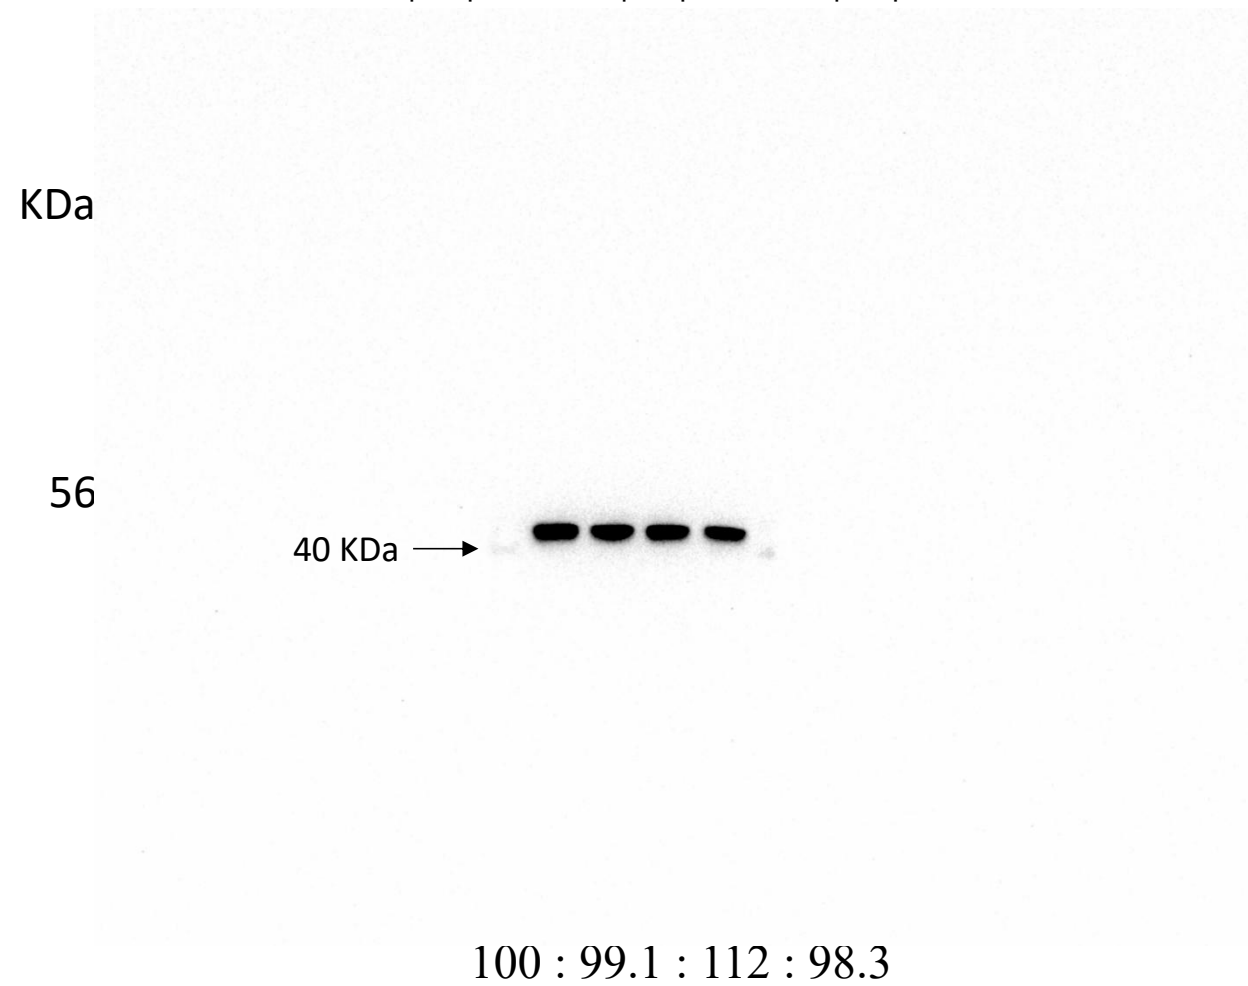

Figure 7-G

**p-Akt**  
**SH-SY5Y Cell**

Control | 0.64 $\mu$ M BI-D1870 | 1.28 $\mu$ M BI-D1870 | 2.56 $\mu$ M BI-D1870

KDa

56

60 KDa →  
40 KDa →

100 : 59.6 : 30.9 : 19.3

Figure 7-G

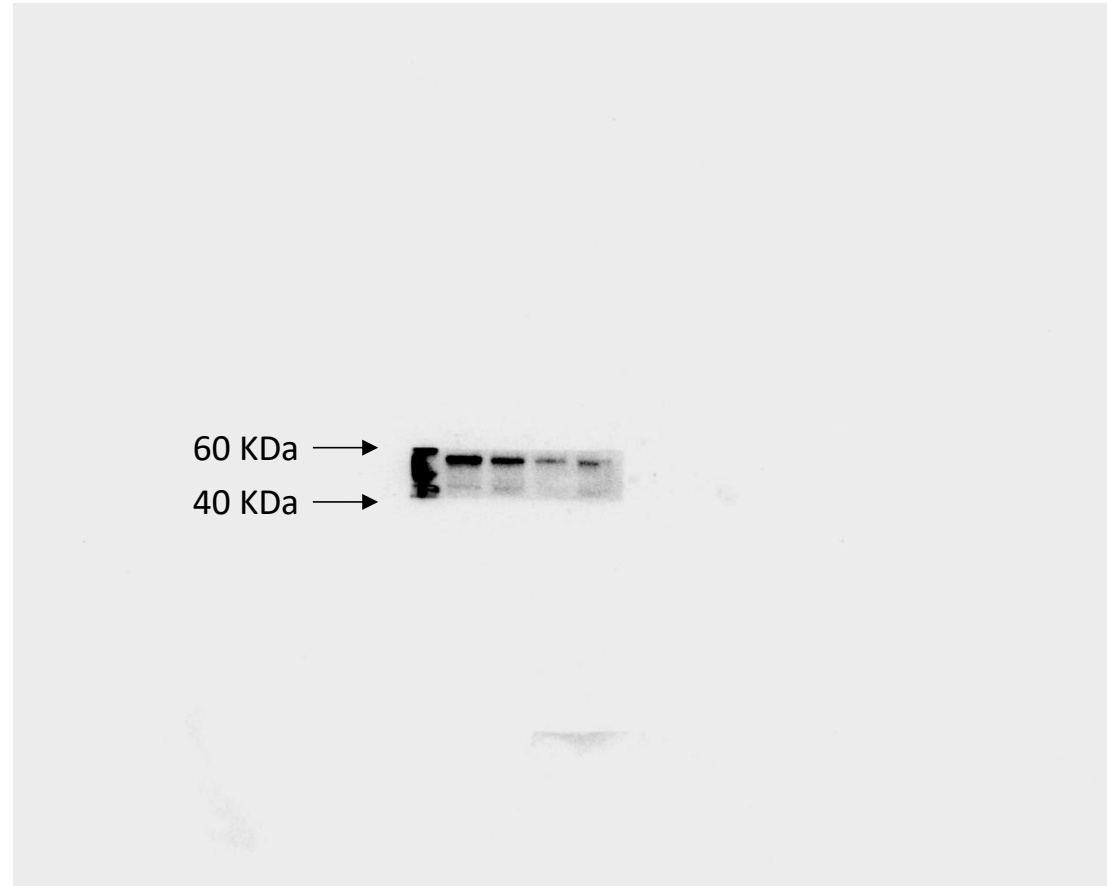

# GADPH

## SH-SY5Y Cell

Control | 0.64 $\mu$ M BI-D1870 | 1.28 $\mu$ M BI-D1870 | 2.56 $\mu$ M BI-D1870 ; Control | 0.64 $\mu$ M BI-D1870 | 1.28 $\mu$ M BI-D1870 | 2.56 $\mu$ M BI-D1870

KDa

36

35 KDa →

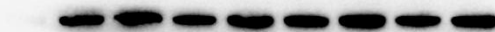

100:100:100:100 ; 100:100:100:100

Figure 7-G

# RSK1

## SH-SY5Y Cell

Control | 0.64μM BI-D1870 | 1.28μM BI-D1870 | 2.56μM BI-D1870 ; Control | 0.64μM BI-D1870 | 1.28μM BI-D1870 | 2.56μM BI-D1870

KDa

90

150 KDa→  
90 KDa →

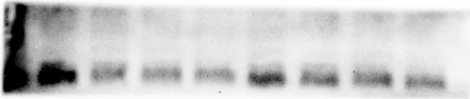

100 : 42.2: 41.7: 24.6 ; 100: 40.4 : 29.5 : 19.4

Figure 7-G

# mTOR SH-SY5Y Cell

Control | 0.64μM BI-D1870 | 1.28μM BI-D1870 | 2.56μM BI-D1870 ; Control | 0.64μM BI-D1870 | 1.28μM BI-D1870 | 2.56μM BI-D1870

KDa

289

250 KDa →

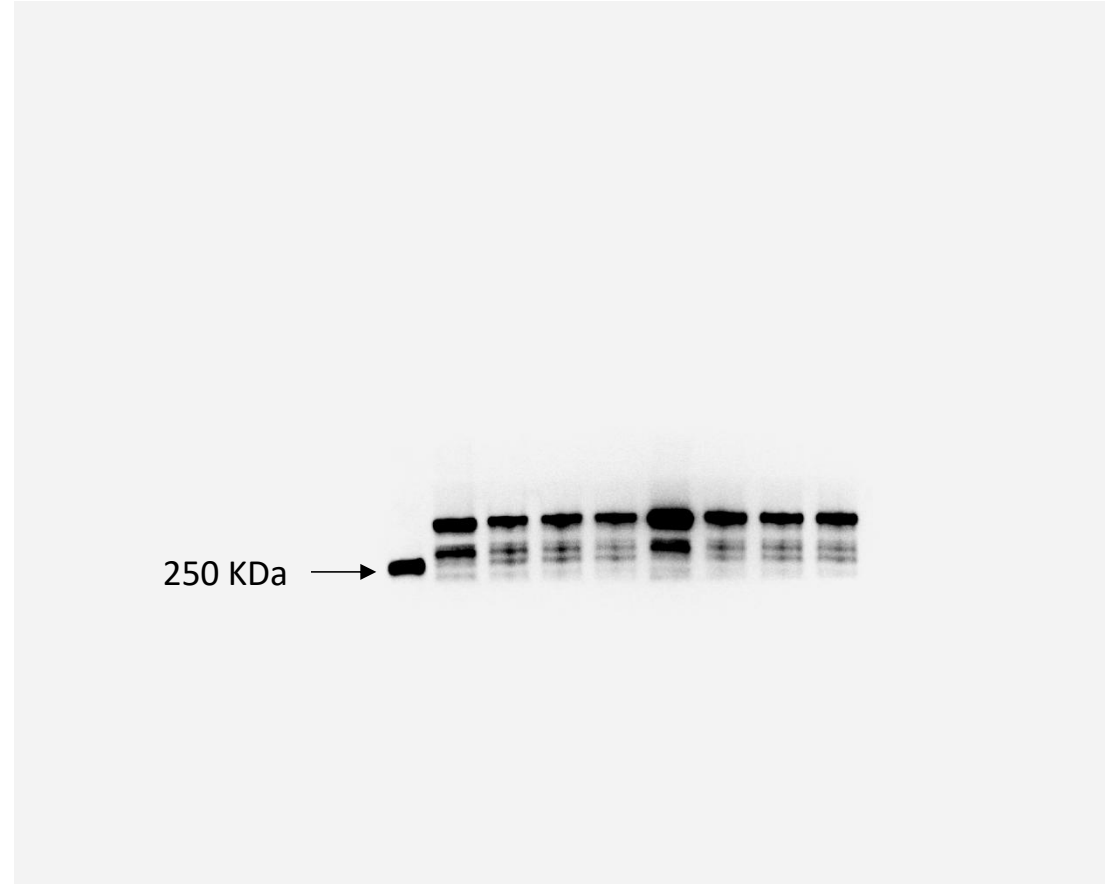

100 : 38.0 : 41.3 : 35.7 ; 100 : 62.6 : 43.3 : 37.5

Figure 7-G



**p-mTOR**  
**SH-SY5Y Cell**

Control | 0.64 $\mu$ M BI-D1870 | 1.28 $\mu$ M BI-D1870 | 2.56 $\mu$ M BI-D1870 ; Control | 0.64 $\mu$ M BI-D1870 | 1.28 $\mu$ M BI-D1870 | 2.56 $\mu$ M BI-D1870

KDa

289

250 KDa →

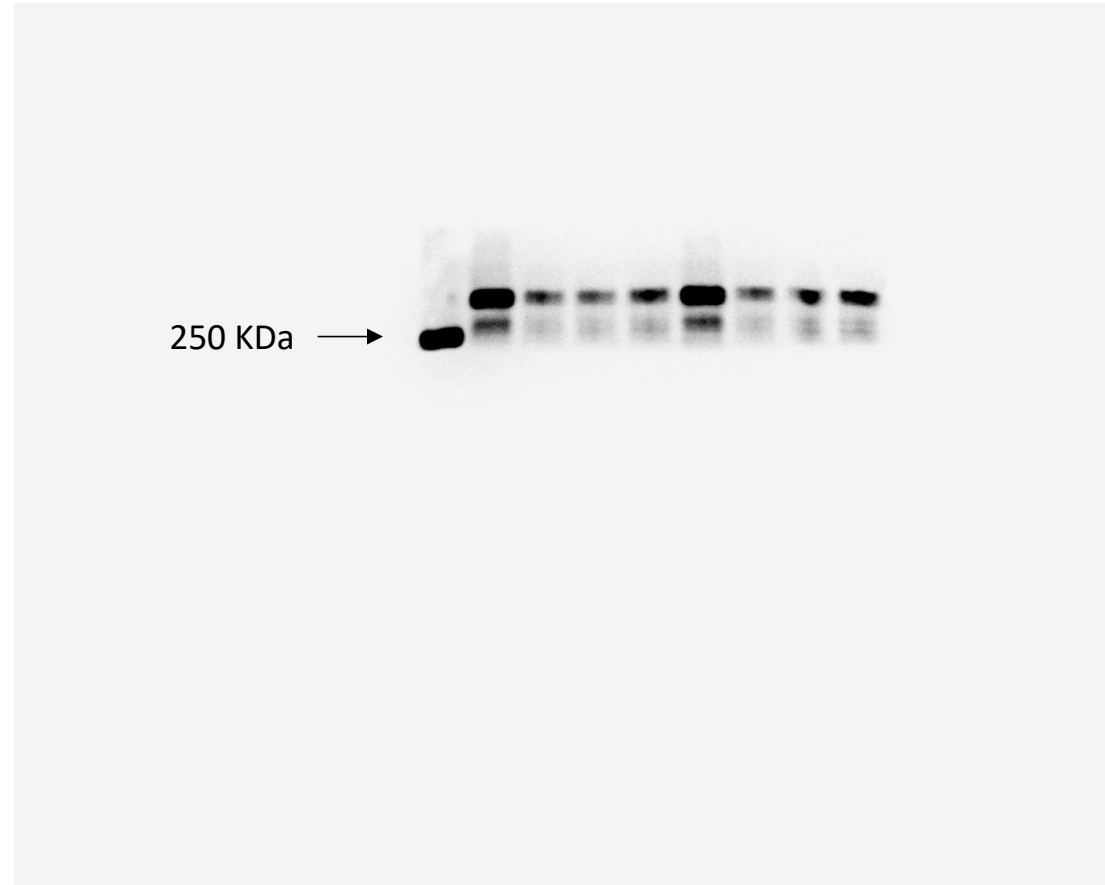

100 : 14.3 : 12.9: 17.3 ; 100 : 13.0 : 14.2 : 15.9

Figure 7-G

**Raptor**  
**SH-SY5Y Cell**

Control | 0.64μM BI-D1870 | 1.28μM BI-D1870 | 2.56μM BI-D1870 ; Control | 0.64μM BI-D1870 | 1.28μM BI-D1870 | 2.56μM BI-D1870

KDa

149

150 KDa

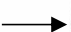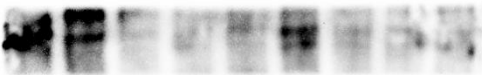

100 : 25.3 : 20.9: 16.3 ; 100 : 37.9: 37.8 : 25.8

Figure 7-G

# RPS1 SH-SY5Y Cell

Control | 0.64μM BI-D1870 | 1.28μM BI-D1870 | 2.56μM BI-D1870 ; Control | 0.64μM BI-D1870 | 1.28μM BI-D1870 | 2.56μM BI-D1870

KDa

29

35 KDa

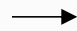

20 KDa

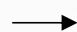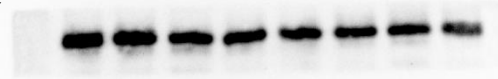

100 : 103 : 96 : 86 ; 100 : 97 : 92 : 83

Figure 7-G

**p-RPS1**  
**SH-SY5Y Cell**

Control | 0.64μM BI-D1870 | 1.28μM BI-D1870 | 2.56μM BI-D1870 ; Control | 0.64μM BI-D1870 | 1.28μM BI-D1870 | 2.56μM BI-D1870

KDa

29

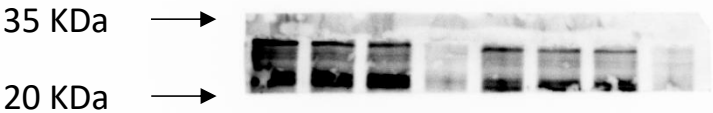

100 : 71.2 : 66.2 : 13 ; 100 : 69.5: 66.1 : 21

Figure 7-G

**4E BP1**  
**SH-SY5Y Cell**

Control | 0.64μM BI-D1870 | 1.28μM BI-D1870 | 2.56μM BI-D1870 ; Control | 0.64μM BI-D1870 | 1.28μM BI-D1870 | 2.56μM BI-D1870

KDa

17

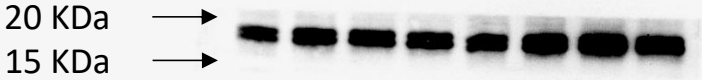

100 : 113 : 112: 111 ; 100 : 104: 106 : 105

Figure 7-G

**p-4E BP1**  
**SH-SY5Y Cell**

Control | 0.64μM BI-D1870 | 1.28μM BI-D1870 | 2.56μM BI-D1870 ; Control | 0.64μM BI-D1870 | 1.28μM BI-D1870 | 2.56μM BI-D1870

KDa

17

20 KDa  
15 KDa

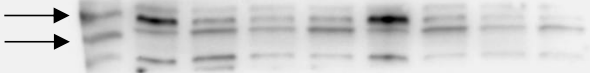

100 : 45.1 : 20.2 : 22.4 ; 100 : 27.2 : 12 : 8

Figure 7-G

# CLIP170 SH-SY5Y Cell

Control | 0.64μM BI-D1870 | 1.28μM BI-D1870 | 2.56μM BI-D1870 ; Control | 0.64μM BI-D1870 | 1.28μM BI-D1870 | 2.56μM BI-D1870

KDa

170

250 KDa →

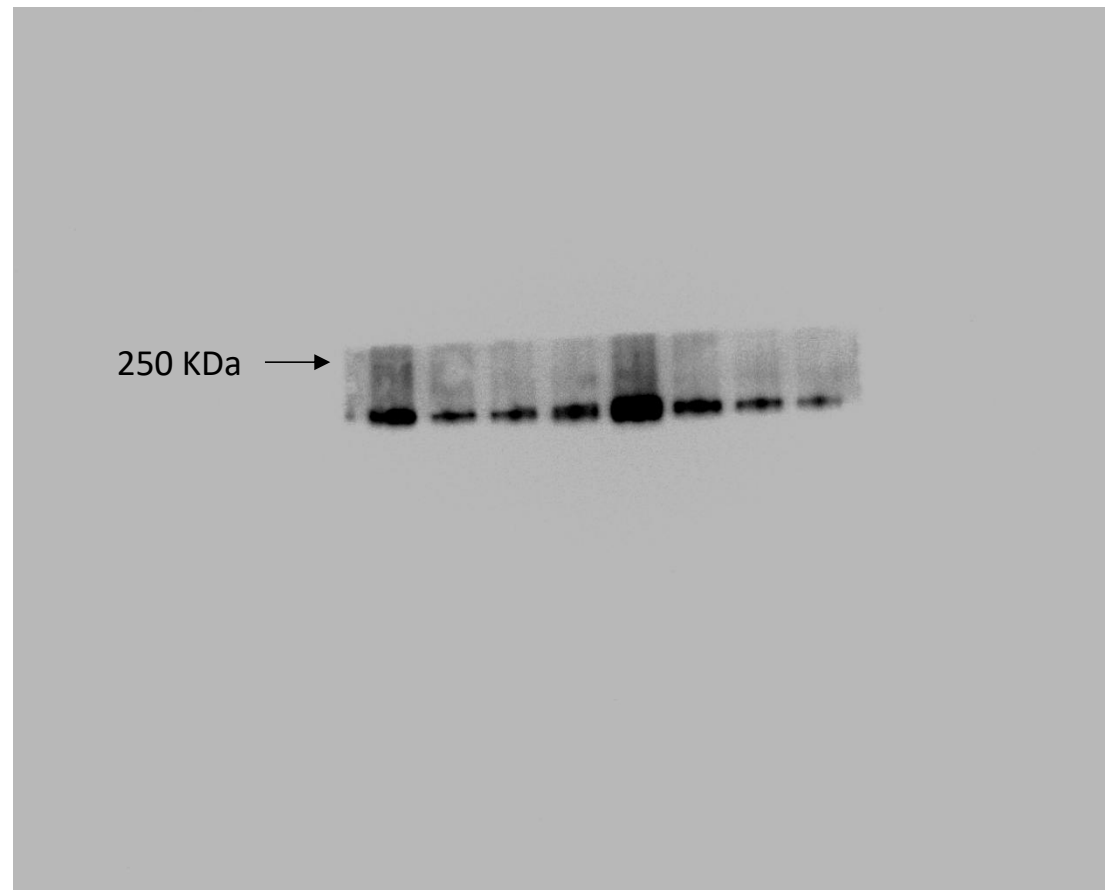

100 : 22 : 20 : 23 ; 100 : 46.3 : 25 : 7

Figure 7-G

**Aurora A**  
**SH-SY5Y Cell**

MARKER | Control | 0.64μM BI-D1870 | 1.28μM BI-D1870 | 2.56μM BI-D1870 ; Control | 0.64μM BI-D1870 | 1.28μM BI-D1870 | 2.56μM BI-D1870

KDa

46

60 KDa  
40 KDa

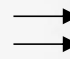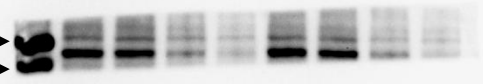

100 : 66 : 40.1 : 33 ; 100 : 57.3 : 35 : 27

Figure 7-G



# CDK1 SH-SY5Y Cell

Control | 0.64μM BI-D1870 | 1.28μM BI-D1870 | 2.56μM BI-D1870 ; Control | 0.64μM BI-D1870 | 1.28μM BI-D1870 | 2.56μM BI-D1870

KDa

34

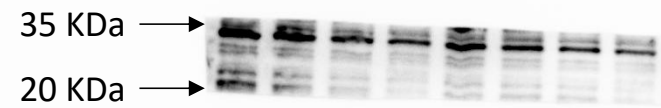

100 : 79.9 : 62.0 : 49 ; 100 : 72.7: 55.3 : 32.6

Figure 7-G

**GAPDH**  
**SH-SY5Y Cell**

Control | 1.28μM BI-D1870 6h | 1.28μM BI-D1870 12h

KDa

36

35 KDa →

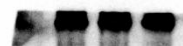

100 :100 : 100

Figure 7-I

**PI3K**  
**SH-SY5Y Cell**

Control | 1.28 $\mu$ M BI-D1870 6h | 1.28 $\mu$ M BI-D1870 12h

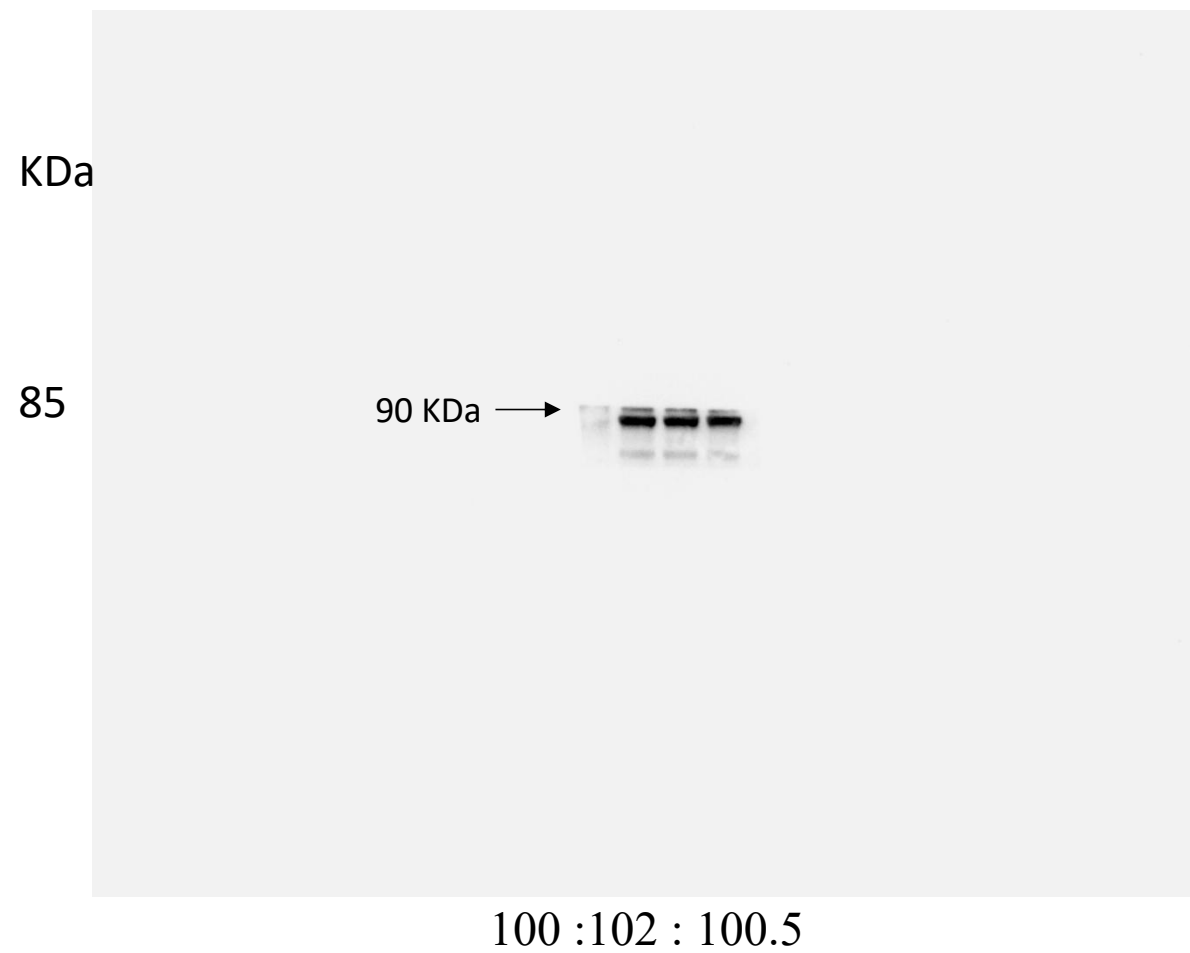

Figure 7-I

**p-PI3K**  
**SH-SY5Y Cell**

Control | 1.28 $\mu$ M BI-D1870 6h | 1.28 $\mu$ M BI-D1870 12h

KDa

85

90 KDa

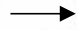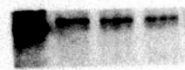

100 : 95.5 : 53.6

Figure 7-I

# Akt

## SH-SY5Y Cell

Control | 1.28μM BI-D1870 6h | 1.28μM BI-D1870 12h

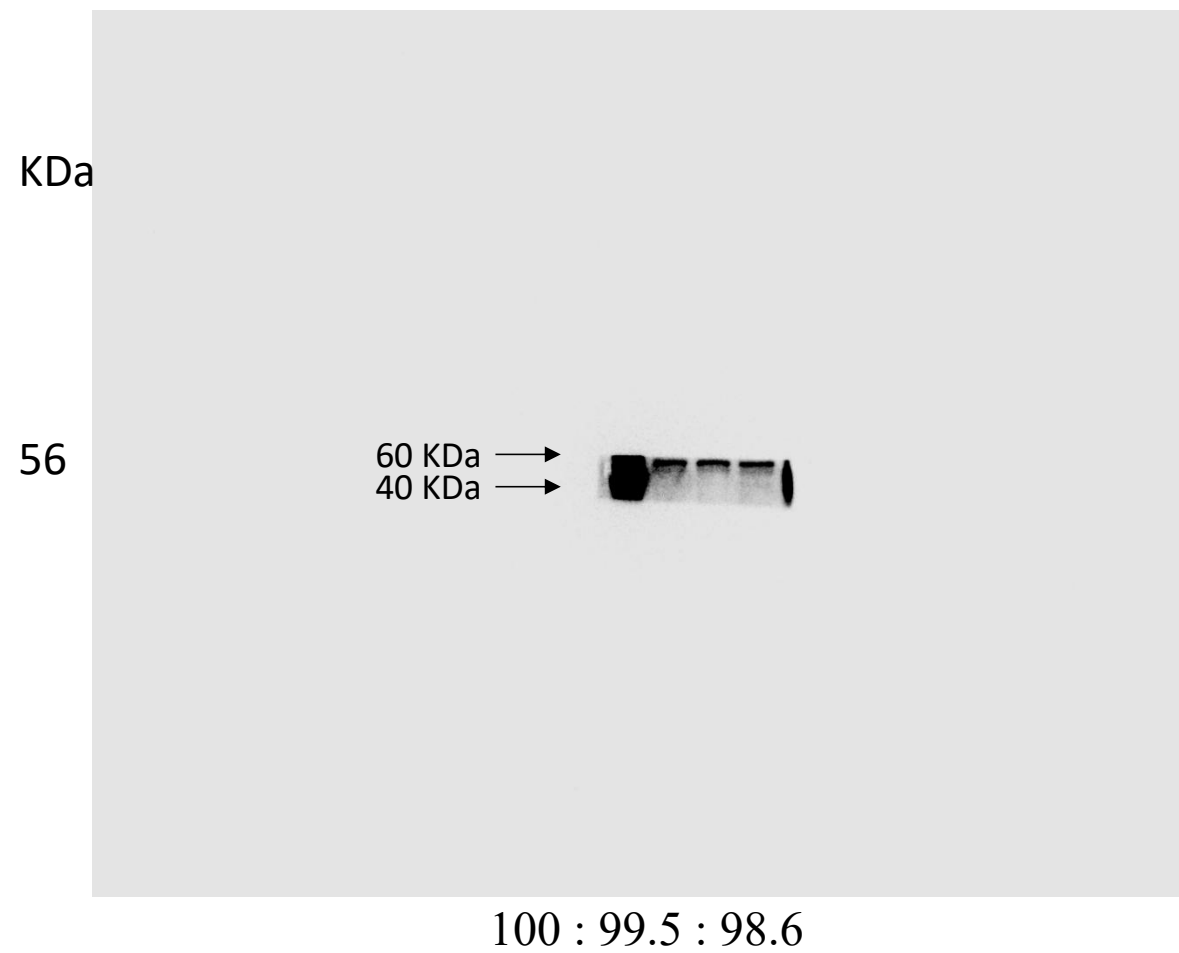

Figure 7-I

**p-Akt**  
**SH-SY5Y Cell**

Control | 1.28 $\mu$ M BI-D1870 6h | 1.28 $\mu$ M BI-D1870 12h

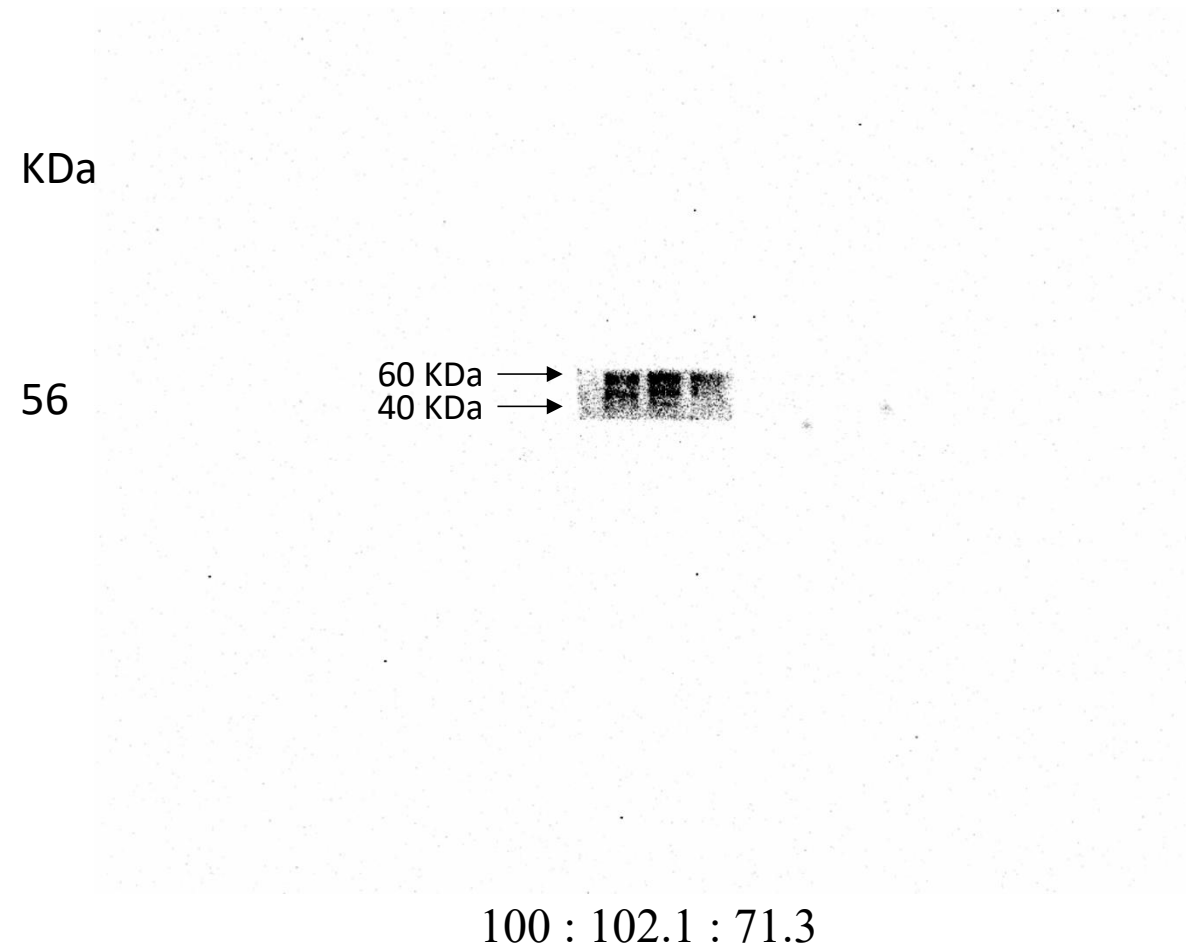

Figure 7-I
